# Supplementary material for: Amino Acid Variation at the Mitochondrial Binding Site of Antimycin A is Proposed to Reflect Sensitivity and Toxicity Differences among Fish Species
Source: MDPI journal article supplement (doi:10.3390/fishes8070381), 2023-07-22
Supplement: s1 [file s1]

# Supplementary Materials: Amino Acid Variation at the Mitochondrial Binding Site of Antimycin A Is Proposed to Reflect Sensitivity and Toxicity Differences among Fish Species

Brooke A. Baudoin, Bonnie L. Brown, Robin D. Calfee and Jill A. Jenkins

**Table S2.** Within each fish species, the occurrence of amino acid variation (Intraspecies Variation = Intra) per motif is noted. Inter-species variation (Inter) reflects the occurrence of variation from CCM as compared to all fish species with that complete motif.

|                                                        | Common Carp<br>(n=203) <sup>1</sup> |       |       | Bighead Carp<br>(n=48)   |       |       | Silver Carp<br>(n=122) |       |       | Grass Carp<br>(n=96)   |       |       | Black Carp<br>(n=46) |       |       | Channel Catfish<br>(n=14)       |       |       |
|--------------------------------------------------------|-------------------------------------|-------|-------|--------------------------|-------|-------|------------------------|-------|-------|------------------------|-------|-------|----------------------|-------|-------|---------------------------------|-------|-------|
| Motif                                                  | n <sup>3</sup>                      | Intra | Inter | n                        | Intra | Inter | n                      | Intra | Inter | n                      | Intra | Inter | n                    | Intra | Inter | n                               | Intra | Inter |
| <sup>15</sup> DALVD <sub>33</sub> (n=709) <sup>2</sup> | 157                                 | 4.46  | 0.99  | 47                       | 2.13  | 0.14  | 111                    | 0.90  | 0.14  | 94                     | 0     | 0     | 45                   | 0     | 0     | 31                              | 0     | 4.37  |
| <sup>33</sup> GSLGLC <sub>195</sub> (n=739)            | 175                                 | 3.43  | 0.81  | 47                       | 0     | 0     | 119                    | 0     | 0     | 95                     | 0     | 0     | 46                   | 0     | 0     | 31                              | 3.23  | 4.06  |
| <sup>195</sup> HLLF <sub>203</sub> (n=635)             | 125                                 | 0     | 0     | 46                       | 0     | 0     | 116                    | 0     | 0     | 95                     | 0     | 0     | 42                   | 0     | 0     | 25                              | 4     | 3.78  |
| <sup>203</sup> GSNN <sub>218</sub> (n=650)             | 141                                 | 0     | 0     | 46                       | 0     | 0     | 116                    | 0     | 0     | 95                     | 0     | 0     | 42                   | 0     | 0     | 25                              | 0     | 0     |
| <sup>218</sup> SFHP <sub>126</sub> (n=652)             | 141                                 | 0     | 0     | 47                       | 0     | 0     | 118                    | 0     | 0     | 95                     | 0     | 0     | 42                   | 0     | 0     | 25                              | 0     | 0     |
| <sup>126</sup> KDLL <sub>380</sub> (n=652)             | 141                                 | 0     | 0     | 47                       | 0     | 0     | 118                    | 0     | 0     | 95                     | 0     | 0     | 42                   | 0     | 0     | 25                              | 0     | 0     |
|                                                        | Bluegill<br>(n=20)                  |       |       | Fathead Minnow<br>(n=38) |       |       | Walleye<br>(n=71)      |       |       | Yellow Perch<br>(n=41) |       |       | Tilapia<br>(n=49)    |       |       | American Gizzard<br>Shad (n=10) |       |       |
|                                                        | n                                   | Intra | Inter | n                        | Intra | Inter | n                      | Intra | Inter | n                      | Intra | Inter | n                    | Intra | Inter | n                               | Intra | Inter |
| <sup>15</sup> DALVD <sub>33</sub> (n=709)              | 18                                  | 0     | 0     | 37                       | 21.62 | 4.09  | 71                     | 0     | 0     | 41                     | 4.88  | 5.78  | 47                   | 2.13  | 0.14  | 10                              | 0     | 0     |
| <sup>33</sup> GSLGLC <sub>195</sub> (n=739)            | 18                                  | 0     | 0     | 38                       | 2.63  | 0.14  | 71                     | 0     | 0     | 41                     | 0     | 0     | 48                   | 0     | 0     | 10                              | 0     | 0     |
| <sup>195</sup> HLLF <sub>203</sub> (n=635)             | 15                                  | 0     | 0     | 37                       | 0     | 0     | 70                     | 0     | 0     | 25                     | 0     | 0     | 29                   | 0     | 4.57  | 10                              | 0     | 0     |
| <sup>203</sup> GSNN <sub>218</sub> (n=650)             | 15                                  | 0     | 0     | 37                       | 0     | 0     | 70                     | 0     | 0     | 25                     | 0     | 0     | 29                   | 0     | 0     | 9                               | 0     | 0     |
| <sup>218</sup> SFHP <sub>126</sub> (n=652)             | 15                                  | 46.67 | 1.23  | 37                       | 0     | 0     | 70                     | 0     | 0     | 25                     | 0     | 0     | 28                   | 0     | 0     | 9                               | 0     | 0     |
| <sup>126</sup> KDLL <sub>380</sub> (n=652)             | 15                                  | 0     | 0     | 37                       | 0     | 0     | 70                     | 0     | 0     | 25                     | 0     | 0     | 28                   | 0     | 0     | 9                               | 0     | 0     |

<sup>1</sup> Denotes the number of fish per species.

<sup>2</sup> Denotes the number of all individuals with a particular amino acid sequence.

<sup>3</sup> Denotes the sample of individuals from each species with a motif.
